# Supplementary material for: SLC8A1 as a novel susceptibility gene in facilitating tendinopathy: Insights into Its Mechanisms from Mendelian Randomization and Experimental Validation
Source: Research Square preprint supplement (doi:10.21203/rs.3.rs-7266504/v1), 2025-08-19
Supplement: Supplementary file 1 [file 447e9e960c972c7fff7d3426.docx]

**Supplement Materials**

**Figure S1**. Detailed (A) forest plot, (B) scatter plot, and (C) leave-one-out analysis for the causality of SLC8A1 eQTL susceptibility to TD;

**Figure S2**. Detailed (A) forest plot, (B) scatter plot, and (C) leave-one-out analysis for the causality of SLC8A1 eQTL susceptibility to the gamma−glutamylisoleucine metabolite levels;

**Figure S3**. Detailed (A) forest plot, (B) scatter plot, and (C) leave-one-out analysis for the causality of the gamma−glutamylisoleucine metabolite level susceptibility to TD;
